# Supplementary material for: A Computational Framework for Solving Nonlinear Binary Optimization Problems in Robust Causal Inference
Source: Atypon-hosted journal article supplement (doi:10.1287/ijoc.2022.1226), 2022-08-10
Supplement: ijoc.2022.1226.sm2.pdf [file ijoc.2022.1226.sm2.pdf]

# Online Supplement S2 to “A Computational Framework for Solving Nonlinear Binary Optimization Problems in Robust Causal Inference”

Md Saiful Islam<sup>a</sup>, Md Sarowar Morshed<sup>a</sup>, Md. Noor-E-Alam<sup>a,\*</sup>

<sup>a</sup>Department of Mechanical and Industrial Engineering  
Northeastern University, Boston, MA 02115, USA

\*Corresponding author’s email: mnalam@neu.edu

## Data Source:

Any interested researcher can access the dataset from the original source described below. However, to ensure convenient access to these datasets, we include the data files (including one processed/customized data set) used in the case studies to this online supplement.

### Case Study in Section 5.1: Effect of fly ash on strength of concrete:

Yeh IC (1998) Modeling of strength of high-performance concrete using artificial neural networks. *Cement and Concrete research* 28(12):1797–1808.

**Data link:** <https://archive.ics.uci.edu/ml/datasets/concrete+compressive+strength>

### Case Study in Section 5.2: Effect of misty weather on number of bike rentals:

Fanaee-T H, Gama J (2014) Event labeling combining ensemble detectors and background knowledge. *Progress in Artificial Intelligence* 2(2):113–127, ISSN 2192-6360, URL <http://dx.doi.org/10.1007/s13748-013-0040-3>.

**Original data link:** <https://archive.ics.uci.edu/ml/datasets/bike+sharing+dataset>

A customized dataset is used in this case study. Used data file is uploaded as an online supplement of this paper.

### Case Study in Section 5.3: Effect of product’s location on price:

Lapczynski M, Bialowas S (2013) Discovering patterns of users’ behaviour in an e-shop-comparison of consumer buying behaviours in poland and other european countries. *Studia Ekonomiczne* 151:144–153.

**Data link:**

<https://archive.ics.uci.edu/ml/datasets/clickstream+data+for+online+shopping>
